# Supplementary material for: Identification and Characterization of Wor4, a New Transcriptional Regulator of White-Opaque Switching
Source: PubMed Central journal article supplement (PMC4777133; doi:10.1534/g3.115.024885), 2016-01-13
Supplement: supp_g3.115.024885_024885SI.pdf [file supp_g3.115.024885_024885SI.pdf]

## **Identification and characterization of Wor4, a new transcriptional regulator of white-opaque switching**

Matthew B. Lohse<sup>\*,1</sup> and Alexander D. Johnson<sup>\*,†,2</sup>

<sup>\*</sup>Department of Microbiology and Immunology, 600 16<sup>th</sup> Street, University of California, San Francisco, San Francisco, CA 94158, USA

<sup>†</sup>Department of Biochemistry and Biophysics, 600 16<sup>th</sup> Street, University of California, San Francisco, San Francisco, CA 94158, USA

<sup>1</sup>Present address: BioSynesis Inc., San Francisco, CA, USA

<sup>2</sup>Address correspondence to: Alexander D. Johnson (ajohnson@cgl.ucsf.edu)

## Supplemental Figures

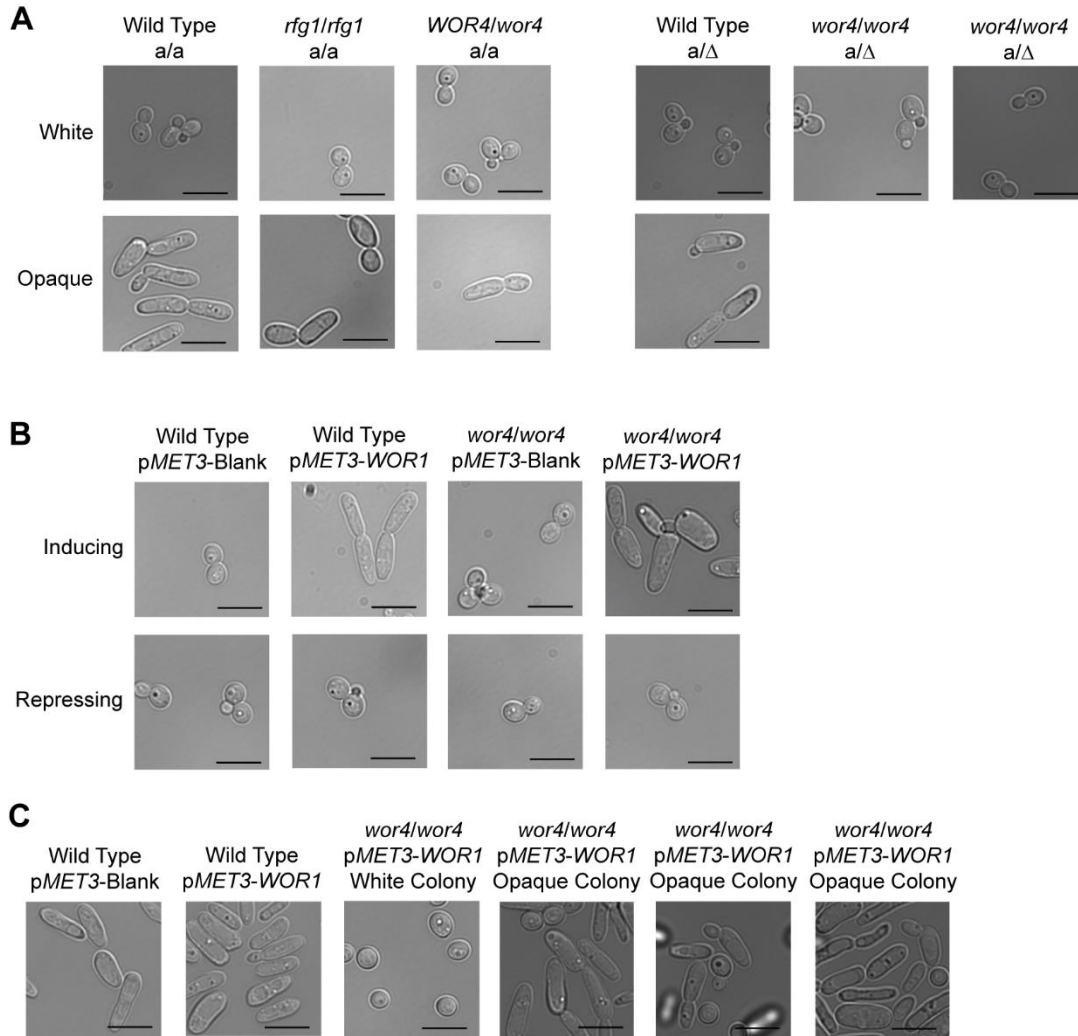

Figure S1: Single cell morphology of *wor4* and *rfg1* deletions. (a) Typical white and opaque cells for the *wor4* heterozygous deletion as well as the *wor4* and *rfg1* homozygous deletions as well as the matching wild type strains. (b) Typical cellular morphology for strains with the pMET3 ectopic expression system driving *WOR1* or an empty control in the wild type and *wor4* deletion backgrounds on inducing or repressing media. (c) Opaque colonies from the *WOR1* ectopic expression assay in (b) were restreaked to repressing media plates and the resulting colonies were then resuspended in water, diluted, and plated on repressing media and allowed to grow.

Images were taken of typical cells from one white and three opaque looking *pMET3-WOR1* *wor4/wor4* colonies as well as opaque colonies of the control strains. Scale bars are 10 $\mu$ m.

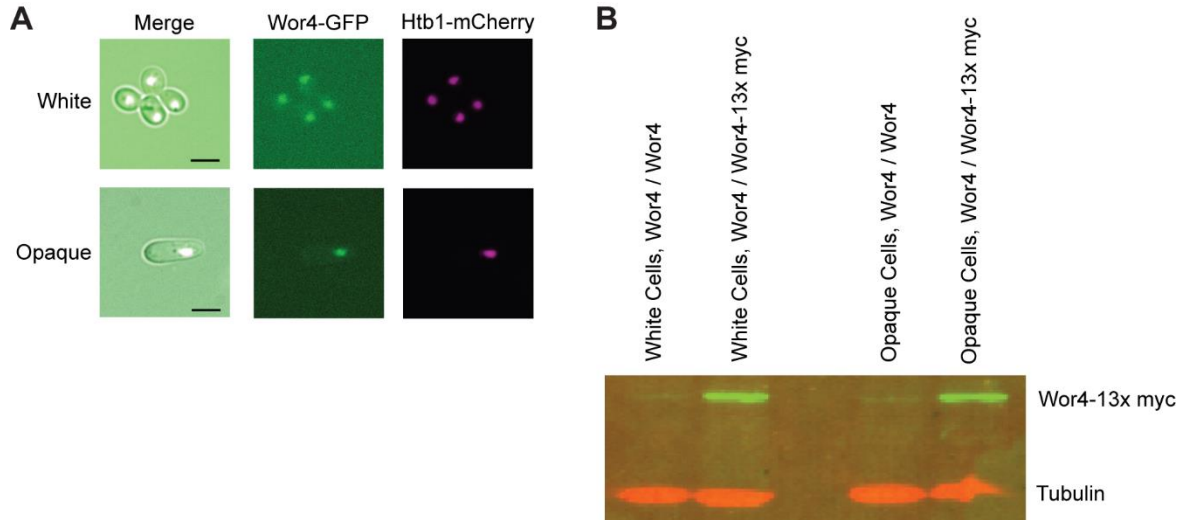

Figure S2: Wor4 localizes to the nucleus in both white and opaque cells. (a) Visualization of Wor4-GFP and Htb1-mCherry fusion proteins in both white and opaque cells. Merged images (DIC, GFP, mCherry), GFP fluorescence, and mCherry fluorescence are shown. Scale bar is 5 $\mu$ m. (b) Western blot of white and opaque strains either containing (Wor4/Wor4-13x myc) or lacking (Wor4/Wor4) c-terminally 13x myc tagged Wor4. Wor4 in green,  $\alpha$ -tubulin loading control in red.

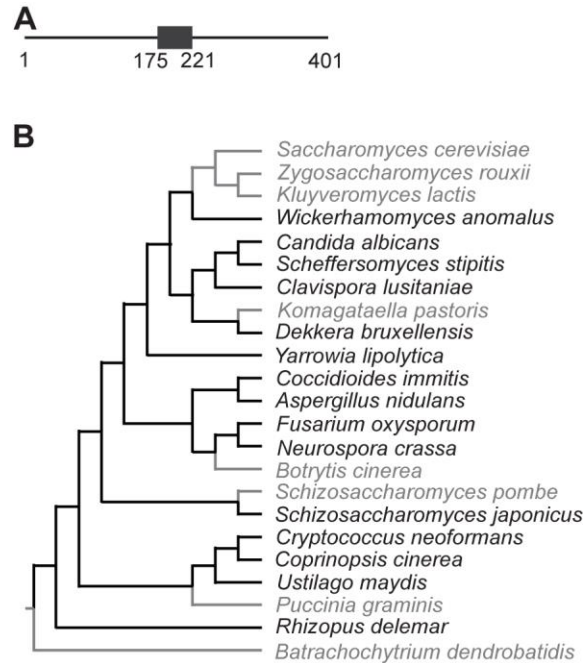

Figure S3: Wor4 belongs to the C2H2 Zinc Finger family of proteins and is found across the fungal domain. (a) Scale model of Wor4, the black box represents the 47aa (amino acids 175-221) region identified by HHpred as belonging to the C2H2 Zinc Finger family. ELM identified a similar, although smaller, region (amino acids 186-212) as belonging to the same family. (b) Phylogenetic tree of 23 fungal species, species with a Wor4 homolog are in black and species lacking a Wor4 homolog are in grey. Branch lengths are not to scale.

## Supplemental Tables

Table S1: Oligonucleotides used in this study.

| Category                | Name     | Description        | Oligonucleotide sequence                                        |
|-------------------------|----------|--------------------|-----------------------------------------------------------------|
| pMBL180 construct ion   | MBL12 2  | mCherry 5' HindIII | gttacaagcttATG GTT TCT AAG GGT GAA GAA GAT                      |
| pMBL180 construct ion   | MBL12 1  | mCherry 3' PstI    | ctcggactgcagTTAC TTG TAC AAT TCA TCC ATA CCA CC                 |
| pMBL180 construct ion   | MBL35 4  | SAT1 5' PstI       | Gttaca ctgcag GAG TGA AAT TCT GGA AAT CTG GAA ATC               |
| pMBL180 construct ion   | MBL35 5  | SAT1 3' HindIII    | ctcggg gatcc GCA GGA CCA CCT TTG ATT GTA AAT AG                 |
|                         |          |                    |                                                                 |
| pADH76 Construction     | AHO6 96  | GFP 5' Aval        | aaaactcgagcggatccccgggtaattaacggtatgtctaaaggtgaagaattattcactggg |
| pADH76 Construction     | AHO6 98  | GFP 3' Aval        | cttcctcgagTTATTTGTACAATTCATCCATACCATG                           |
|                         |          |                    |                                                                 |
| pADH57 construct ion    | AHO4 07  | TDH3 5' XbaI       | tgggtatctagatgctcctcgtcgacaacgac                                |
| pADH57 construct ion    | AHO4 08  | TDH3 3' BamHI      | CCCGGGGATCCTAATTTGATTGTAAAGTTTGTGATGTTAATTG                     |
|                         |          |                    |                                                                 |
| WOR4 Ectopic Expression | MLP78 0  | Wor4 5' BamHI      | Gttaca GGATCC ATG TCG AGT GAT AAA CCT GAA CAA G                 |
| WOR4 Ectopic Expression | MLP78 1  | Wor4 3' XmaI       | CTC GGA CCC GGG TTA AAT GCC TGG TTG GGT TG                      |
| WOR4 Ectopic Expression | MLP11 37 | Wor4 3' PstI       | CTC GGA CTG CAG TTA AAT GCC TGG TTG GGT TG                      |
|                         |          |                    |                                                                 |

|                         |          |                         |                                                     |
|-------------------------|----------|-------------------------|-----------------------------------------------------|
| RFG1 Ectopic Expression | MLP77 7  | Rfg1 5' BamHI           | Gttaca GGATCC ATG TCT ACT GCT ATC TAC TAT TCA ACT C |
| RFG1 Ectopic Expression | MLP77 8  | Rfg1 3' XmaI            | CTC GGA CCC GGG TTA TTG TGG AGG TTG TTG TTG ATG AT  |
|                         |          |                         |                                                     |
| WOR4 Deletion           | NHO3 20  | WOR4 5' External        | TTGGGCTGATCTATACTTCTGGGTA                           |
| WOR4 Deletion           | NHO3 21  | WOR4 5' Internal        | CACGGCGCGCCTAGCAGCGGCCTCAAGCTGCAAAAATAGTT TCTCTC    |
| WOR4 Deletion           | NHO3 22  | WOR4 3' Internal        | GTCAGCGGCCGCATCCCTGCGAAATGAGGATTTGAATGATC CTCTGTTG  |
| WOR4 Deletion           | NHO3 23  | WOR4 3' External        | TCAGCACTATCCATATCTTCAGCCA                           |
| WOR4 Deletion           | NHO3 24  | WOR4 5' Check           | GAAGGAATTGAGCAATAGGACAAAGATTTG                      |
| WOR4 Deletion           | NHO3 25  | WOR4 3' Check           | AGCGATGAATCAACATCACCAACTTG                          |
| WOR4 Deletion           | NHO3 26  | WOR4 5' ORF Check Set 1 | ATGCCAATTACCAACCTCAAGCTC                            |
| WOR4 Deletion           | NHO3 27  | WOR4 3' ORF Check Set 1 | CCATACCAATAGTTTCCAGCAGT                             |
| WOR4 Deletion           | MLP10 51 | WOR4 5' ORF Check Set 2 | TAA CCA AAA AGC ATG GTC ACA GAA AAT C               |
| WOR4 Deletion           | MLP10 52 | WOR4 3' ORF Check Set 2 | CAA CGT CAT TGA TTC CTA AGA GAG AC                  |
| WOR4 Deletion           | MLp10 53 | WOR4 5' ORF Check Set 3 | CCT AGA TCC AAA GGA TTC AAA AAA CGC                 |
| WOR4 Deletion           | MLp10 54 | WOR4 3' ORF             | CAG GAA ACG AAC AAG GAT ATT TTC TCT C               |

|               |         |                           |                                                                                                                        |
|---------------|---------|---------------------------|------------------------------------------------------------------------------------------------------------------------|
|               |         | Check Set 3               |                                                                                                                        |
| RFG1 Deletion | NHO3 47 | RFG1 5' External          | GGTGACTCCGATTTTCCGAACTAA                                                                                               |
| RFG1 Deletion | NHO3 48 | RFG1 5' Internal          | CACGGCGCGCCTAGCAGCGGTGGTGTGATGGTTTGCAAATAAATAC                                                                         |
| RFG1 Deletion | NHO3 49 | RFG1 3' Internal          | GTCAGCGGCCGCATCCCTGCGTAGCTTGCTTTCTCTACAGAAAAGAGAAT                                                                     |
| RFG1 Deletion | NHO3 50 | RFG1 3' External          | AAGGTGGCCGTGTGAGAAAGTTTA                                                                                               |
| RFG1 Deletion | NHO3 51 | RFG1 5' Check             | CACACACCTGCACACCTACATTTG                                                                                               |
| RFG1 Deletion | NHO3 52 | RFG1 3' Check             | TTGGTTTAGGACCTGGGCGT                                                                                                   |
| RFG1 Deletion | NHO3 53 | RFG1 5' ORF Check Set     | TTGGTGGTGGTATTGATGGTAACTTT                                                                                             |
| RFG1 Deletion | NH354   | RFG1 3' ORF Check Set     | ACGAGAAGTTAATCCACCACTGAGACT                                                                                            |
|               |         |                           |                                                                                                                        |
| WOR4 Tagging  | MLP87 4 | WOR4-13x Myc and - GFP 5' | Cttaggaatcaatgacgttgattcaagaaccaaatgacgataacaaccaaccaaccaggcatt<br>cggatccccgggtaattaacgg                              |
| WOR4 Tagging  | MLP87 5 | WOR4-13x Myc and - GFP 3' | TTA ATT TTC TAA AAT AAA TCT ATA TGA ATA CAA CAG<br>AGG ATC ATT CAA ATC CTC ATT TCA TTT A<br>GGCGGCCGCTCTAGAACTAGTGGATC |
| WOR4 Tagging  | mLp89 3 | WOR4 5' check             | Atgattacactgctgaaactattggtatg                                                                                          |
| WOR4 Tagging  | MLP88 0 | WOR4 3' check             | GTG GTA CGT GAC AAT GAG GTT GGG                                                                                        |
| WOR4 Tagging  | MLP87 6 | myc 5' check              | CCGTTAATTAACCCGGGGATC                                                                                                  |
| WOR4 Tagging  | MLP87 7 | myc 3' in check           | Ggaactcagatccactagtctagagc                                                                                             |



|                       |          |                      |                                                                                                                          |
|-----------------------|----------|----------------------|--------------------------------------------------------------------------------------------------------------------------|
| WOR4 Tagging          | MLP87 8  | myc 3' flipped check | TCACTAGTGAATTTCGCGCTCGAG                                                                                                 |
| WOR4 Tagging          | MBL20 9  | GFP 5' check         | GGT TGG CCA TGG AAC TGG CA                                                                                               |
| WOR4 Tagging          | MBL38 2  | GFP 3' flipped check | GGT GAT GGT CCA GTC TTG TTA CCA GAC                                                                                      |
|                       |          |                      |                                                                                                                          |
| HTB1 and HTB2 Tagging | MLP11 94 | HTB1-mCherry 5'      | gccgtttccgaaggtaccagagccgtcacaaaatactcatctgctttagt<br>ggtAGAAGAatcCCAGGTtaattaac GTT TCT AAG GGT GAA GAA<br>GAT A        |
| HTB1 and HTB2 Tagging | MLP11 95 | HTB1-mCherry 3'      | AAA AAA AAA GTG GGC AAC TAA AAA TAC AAT TGG GAG<br>ACA ATA CAA GAT CCA TCA CAT CTA GCA GGA CCA CCT<br>TTG ATT GTA AAT AG |
| HTB1 and HTB2 Tagging | MLP11 92 | HTB2-mCherry 5'      | gctgtttctgaaggtactagagctgttaccaaatactcttctgcttcta<br>ggtAGAAGAatcCCAGGTtaattaac GTT TCT AAG GGT GAA GAA GAT A            |
| HTB1 and HTB2 Tagging | MLP11 93 | HTB2-mCherry 3'      | AAC AAT AAT TTG GAG AAA TAA ACC ATT CAT GAC AAA<br>CCT CTC TCT CTC TTT CTT TTT TTA GCA GGA CCA CCT<br>TTG ATT GTA AAT AG |
| HTB1 and HTB2 Tagging | mLP11 98 | HTB1 5' check        | TCT CCT TCT CTC TCT TGT CAC TTC TTC TTC CTC                                                                              |
| HTB1 and HTB2 Tagging | MLP11 99 | HTB1 3' check        | CCA AGA GGT CCC TGA AAT TCA GAA GTT TCT TG                                                                               |
| HTB1 and HTB2 Tagging | MLp11 96 | HTB2 5' check        | CAA TAA CAA CAA GAG ATT CAC GTG ACA CAC AAA                                                                              |
| HTB1 and              | MLP11 97 | HTB2 3' check        | GGA GAT AGA AAA GAA TTG GGT CCA ACA CCA                                                                                  |

|                       |          |                  |                                         |
|-----------------------|----------|------------------|-----------------------------------------|
| HTB2 Tagging          |          |                  |                                         |
| HTB1 and HTB2 Tagging | MLP12 03 | mCherry 5' check | TTG TGG AGA CAA AAT ATC CCA GGC GAA TG  |
| HTB1 and HTB2 Tagging | MLP12 04 | mCherry 3' Check | TTG ACC TCT TCA CGT ATA AAA CTA GAC CTC |
|                       |          |                  |                                         |
| qPCR                  | MLP11 86 | Wor1 5'          | TGGGTATGGTAACCACCTT                     |
| qPCR                  | MLP11 87 | Wor1 3'          | TGATACTACCTGTACCAGTCGCAA                |
| qPCR                  | MLP11 90 | Dyn1 control 5'  | CATCCAACACTTCCAACCAATTACATTA            |
| qPCR                  | MLP11 91 | Dyn1 control 3'  | TAATTCTTGTTCAAAAGCCAAAGATTCTG           |

Table S1: Oligonucleotides used in this study.

Table S2: Plasmids used in this study.

| Description                       | Name    | Reference  |
|-----------------------------------|---------|------------|
| <i>LEU2</i> Knock Out             | pSN40   | 1          |
| <i>HIS1</i> Knock Out             | pSN52   | 1          |
| <i>Arg MTL Knock Out Cassette</i> | pJD1    | 2          |
| p <i>MET3-blank-SAT1</i>          | pADH33  | 3          |
| p <i>TDH3-blank-SAT1</i>          | pADH57  | This Study |
| p <i>MET3-WOR1-SAT1</i>           | pADH35  | 4          |
| p <i>MET3-WOR4-SAT1</i>           | pMBL640 | This Study |
| p <i>MET3-RFG1-SAT1</i>           | pMBL639 | This Study |
| p <i>TDH3-WOR4-SAT1</i>           | pMBL707 | This Study |
| C-terminal CaGFP Source           | pADH76  | This Study |
| C-terminal 13x Myc Source         | pADH34  | 5          |
| C-terminal mCherry Source         | pMBL180 | This Study |

## References

- 1 Noble, S. M., and A. D. Johnson, 2005 Strains and strategies for large-scale gene deletion studies of the diploid human fungal pathogen *Candida albicans*. Eukaryot. Cell 4: 298–309.
- 2 Lin, C. H., S. Kabrawala, E. P. Fox, C. J. Nobile, A. D. Johnson et al., 2013 Genetic control of conventional and pheromone-stimulated biofilm formation in *Candida albicans*. PLoS Pathog. 9: e1003305.
- 3 Lohse, M. B., A. D. Hernday, P. M. Fordyce, L. Noiman, T. R. Sorrells et al., 2013 Identification and characterization of a previously undescribed family of sequence-specific DNA-binding domains. Proc. Natl. Acad. Sci. U. S. A. 110: 7660–7665.
- 4 Hernday, A. D., M. B. Lohse, P. M. Fordyce, C. J. Nobile, J. D. DeRisi et al., 2013 Structure of the Transcriptional Network Controlling White-Opaque Switching in *Candida albicans*. Mol. Microbiol. 90: 22–35.
- 5 Hernday, A. D., S. M. Noble, Q. M. Mitrovich, and A. D. Johnson, 2010 Genetics and molecular biology in *Candida albicans*. Methods Enzymol. 470: 737–758.

Table S2: Plasmids used in this study.

Table S3: Strains used in this study.

| Description                       | Number              | Genotype                                                                                                                                                             | Reference  |
|-----------------------------------|---------------------|----------------------------------------------------------------------------------------------------------------------------------------------------------------------|------------|
| Starting Strains                  |                     |                                                                                                                                                                      |            |
| a/α -His -Leu -Arg Strain         | SNY152              | <i>a/alpha leu2Δ/leu2Δ his1Δ/his1Δ</i><br><i>URA3/ura3Δ::imm<sup>434</sup> IRO1/iro1Δ::imm<sup>434</sup></i><br><i>arg1::hisG/arg1::hisG</i>                         | 1          |
| a/a -His -Leu Strain              | RZY47               | <i>a/a leu2Δ/leu2Δ his1Δ/his1Δ</i><br><i>URA3/ura3Δ::imm<sup>434</sup> IRO1/iro1Δ::imm<sup>434</sup></i>                                                             | 2          |
| Controls                          |                     |                                                                                                                                                                      |            |
| Wild Type, White                  | WTwhite,<br>AHY304  | <i>a/Δalpha C.m.LEU2/leu2Δ C.d.HIS1/his1Δ</i><br><i>URA3/ura3Δ::imm<sup>434</sup> IRO1/iro1Δ::imm<sup>434</sup></i><br><i>arg1::hisG/arg1::hisG ΔMTLalpha ::ARG1</i> | 3          |
| Wild Type, Opaque                 | WTopaque,<br>AHY336 | <i>a/Δalpha C.m.LEU2/leu2Δ C.d.HIS1/his1Δ</i><br><i>URA3/ura3Δ::imm<sup>434</sup> IRO1/iro1Δ::imm<sup>434</sup></i><br><i>arg1::hisG/arg1::hisG ΔMTLalpha ::ARG1</i> | 3          |
| Wild Type, White                  | AHY135              | <i>a/a C.m.LEU2/leu2Δ C.d.HIS1/his1Δ</i><br><i>URA3/ura3Δ::imm<sup>434</sup> IRO1/iro1Δ::imm<sup>434</sup></i>                                                       | 3          |
| Wild Type, Opaque                 | AHY136              | <i>a/a C.m.LEU2/leu2Δ C.d.HIS1/his1Δ</i><br><i>URA3/ura3Δ::imm<sup>434</sup> IRO1/iro1Δ::imm<sup>434</sup></i>                                                       | 3          |
| Ectopic Expression Strains        |                     |                                                                                                                                                                      |            |
| Wild Type, White,<br>pMET3-Blank  | AHY214              | <i>a/a C.m.LEU2/leu2Δ C.d.HIS1/his1Δ</i><br><i>URA3/ura3Δ::imm<sup>434</sup> IRO1/iro1Δ::imm<sup>434</sup></i><br>pMET3-blank; SAT1; RP10                            | 3          |
| Wild Type, Opaque,<br>pMET3-Blank | AHY375,<br>MLY1166  | <i>a/a C.m.LEU2/leu2Δ C.d.HIS1/his1Δ</i><br><i>URA3/ura3Δ::imm<sup>434</sup> IRO1/iro1Δ::imm<sup>434</sup></i><br>pMET3-blank; SAT1; RP10                            | This study |
| Wild Type, White,<br>pMET3-WOR1   | AHY204              | <i>a/a C.m.LEU2/leu2Δ C.d.HIS1/his1Δ</i><br><i>URA3/ura3Δ::imm<sup>434</sup> IRO1/iro1Δ::imm<sup>434</sup></i><br>pMET3-WOR1; SAT1; RP10                             | 3          |
| Wild Type, Opaque,<br>pMET3-WOR1  | MLY1165             | <i>a/a C.m.LEU2/leu2Δ C.d.HIS1/his1Δ</i><br><i>URA3/ura3Δ::imm<sup>434</sup> IRO1/iro1Δ::imm<sup>434</sup></i><br>pMET3-WOR1; SAT1; RP10                             | This Study |
| Wild Type, White,<br>pMET3-WOR4   | MLY1214             | <i>a/a C.m.LEU2/leu2Δ C.d.HIS1/his1Δ</i><br><i>URA3/ura3Δ::imm<sup>434</sup> IRO1/iro1Δ::imm<sup>434</sup></i><br>pMET3-WOR4; SAT1; RP10                             | This Study |
| Wild Type, Opaque,<br>pMET3-WOR4  | MLY1230             | <i>a/a C.m.LEU2/leu2Δ C.d.HIS1/his1Δ</i><br><i>URA3/ura3Δ::imm<sup>434</sup> IRO1/iro1Δ::imm<sup>434</sup></i><br>pMET3-WOR4; SAT1; RP10                             | This Study |

|                                          |                     |                                                                                                                                                                                                                    |            |
|------------------------------------------|---------------------|--------------------------------------------------------------------------------------------------------------------------------------------------------------------------------------------------------------------|------------|
| Wild Type, White,<br>pMET3-RFG1          | MLY1221             | <i>a/a C.m.LEU2/leu2Δ C.d.HIS1/his1Δ<br/>URA3/ura3Δ::imm<sup>434</sup> IRO1/iro1Δ::imm<sup>434</sup><br/>pMET3-RFG1; SAT1; RP10</i>                                                                                | This Study |
| Wild Type, Opaque,<br>pMET3-RFG1         | MLY1241             | <i>a/a C.m.LEU2/leu2Δ C.d.HIS1/his1Δ<br/>URA3/ura3Δ::imm<sup>434</sup> IRO1/iro1Δ::imm<sup>434</sup><br/>pMET3-RFG1; SAT1; RP10</i>                                                                                | This Study |
| <i>wor4/wor4</i> , White,<br>pMET3-Blank | MLY1372,<br>MLY1379 | <i>a/Δalpha leu2Δ/leu2Δ his1Δ/his1Δ<br/>URA3/ura3Δ::imm<sup>434</sup> IRO1/iro1Δ::imm<sup>434</sup><br/>arg1::hisG/arg1::hisG<br/>wor4Δ::C.m.LEU2/wor4Δ::C.d.HIS1 ΔMTLalpha<br/>::ARG1 pMET3-blank; SAT1; RP10</i> | This Study |
| <i>wor4/wor4</i> , White,<br>pMET3-WOR1  | MLY1373,<br>MLY1380 | <i>a/Δalpha leu2Δ/leu2Δ his1Δ/his1Δ<br/>URA3/ura3Δ::imm<sup>434</sup> IRO1/iro1Δ::imm<sup>434</sup><br/>arg1::hisG/arg1::hisG<br/>wor4Δ::C.m.LEU2/wor4Δ::C.d.HIS1 ΔMTLalpha<br/>::ARG1 pMET3-WOR1; SAT1; RP10</i>  | This Study |
| Wild Type, White,<br>pMET3-Blank         | MLY1365             | <i>a/Δalpha C.m.LEU2/leu2Δ C.d.HIS1/his1Δ<br/>URA3/ura3Δ::imm<sup>434</sup> IRO1/iro1Δ::imm<sup>434</sup><br/>arg1::hisG/arg1::hisG ΔMTLalpha ::ARG1<br/>pMET3-blank; SAT1; RP10</i>                               | This Study |
| Wild Type, White,<br>pMET3-WOR1          | MLY1366             | <i>a/Δalpha C.m.LEU2/leu2Δ C.d.HIS1/his1Δ<br/>URA3/ura3Δ::imm<sup>434</sup> IRO1/iro1Δ::imm<sup>434</sup><br/>arg1::hisG/arg1::hisG ΔMTLalpha ::ARG1<br/>pMET3-WOR1; SAT1; RP10</i>                                | This Study |
| <i>wor1/wor1</i> , White,<br>pMET3-Blank | MLY1393             | <i>a/a leu2Δ/leu2Δ his1Δ/his1Δ<br/>URA3/ura3Δ::imm<sup>434</sup> IRO1/iro1Δ::imm<sup>434</sup><br/>wor1Δ::C.m.LEU2/wor1Δ::C.d.HIS1 pMET3-<br/>blank; SAT1; RP10</i>                                                | This Study |
| <i>wor1/wor1</i> , White,<br>pMET3-WOR1  | MLY1394             | <i>a/a leu2Δ/leu2Δ his1Δ/his1Δ<br/>URA3/ura3Δ::imm<sup>434</sup> IRO1/iro1Δ::imm<sup>434</sup><br/>wor1Δ::C.m.LEU2/wor1Δ::C.d.HIS1 pMET3-<br/>WOR1; SAT1; RP10</i>                                                 | This Study |
| <i>wor1/wor1</i> , White,<br>pMET3-WOR4  | MLY1395             | <i>a/a leu2Δ/leu2Δ his1Δ/his1Δ<br/>URA3/ura3Δ::imm<sup>434</sup> IRO1/iro1Δ::imm<sup>434</sup><br/>wor1Δ::C.m.LEU2/wor1Δ::C.d.HIS1 pMET3-<br/>WOR4; SAT1; RP10</i>                                                 | This Study |
| Wild Type, pTDH3-WOR4                    | MLY1420             | <i>a/a C.m.LEU2/leu2Δ C.d.HIS1/his1Δ<br/>URA3/ura3Δ::imm<sup>434</sup> IRO1/iro1Δ::imm<sup>434</sup><br/>pTDH3-WOR4; SAT1; RP10</i>                                                                                | This Study |
| Deletion Strains                         |                     |                                                                                                                                                                                                                    |            |

|                                |                       |                                                                                                                                                                                                                    |            |
|--------------------------------|-----------------------|--------------------------------------------------------------------------------------------------------------------------------------------------------------------------------------------------------------------|------------|
| <i>wor1/wor1</i> , White       | RZY219                | <i>a/a leu2Δ/leu2Δ his1Δ/his1Δ</i><br><i>URA3/ura3Δ::imm<sup>434</sup> IRO1/iro1Δ::imm<sup>434</sup></i><br><i>wor1Δ::C.m.LEU2/wor1Δ::C.d.HIS1</i>                                                                 | 2          |
| <i>WOR4/wor4</i> , White       | MLY1135               | <i>a/a leu2Δ/leu2Δ his1Δ/his1Δ</i><br><i>URA3/ura3Δ::imm<sup>434</sup> IRO1/iro1Δ::imm<sup>434</sup></i><br><i>WOR4/wor4Δ::C.d.HIS1</i>                                                                            | This Study |
| <i>WOR4/wor4</i> , Opaque      | MLY1137               | <i>a/a leu2Δ/leu2Δ his1Δ/his1Δ</i><br><i>URA3/ura3Δ::imm<sup>434</sup> IRO1/iro1Δ::imm<sup>434</sup></i><br><i>WOR4/wor4Δ::C.d.HIS1</i>                                                                            | This Study |
| <i>wor4/wor4</i> , White       | MLY1355A,<br>MLY1355B | <i>a/Δalpha leu2Δ/leu2Δ his1Δ/his1Δ</i><br><i>URA3/ura3Δ::imm<sup>434</sup> IRO1/iro1Δ::imm<sup>434</sup></i><br><i>arg1::hisG/arg1::hisG</i><br><i>wor4Δ::C.m.LEU2/wor4Δ::C.d.HIS1 ΔMTLalpha</i><br><i>::ARG1</i> | This Study |
| <i>rfg1/rfg1</i> , White       | MLY1136               | <i>a/a leu2Δ/leu2Δ his1Δ/his1Δ</i><br><i>URA3/ura3Δ::imm<sup>434</sup> IRO1/iro1Δ::imm<sup>434</sup></i><br><i>rfg1Δ::C.m.LEU2/rfg1Δ::C.d.HIS1</i>                                                                 | This Study |
| <i>rfg1/rfg1</i> , Opaque      | MLY1138               | <i>a/a leu2Δ/leu2Δ his1Δ/his1Δ</i><br><i>URA3/ura3Δ::imm<sup>434</sup> IRO1/iro1Δ::imm<sup>434</sup></i><br><i>rfg1Δ::C.m.LEU2/rfg1Δ::C.d.HIS1</i>                                                                 | This Study |
| Tagged Strains                 |                       |                                                                                                                                                                                                                    |            |
| Wor4-GFP, White                | MLY1295               | <i>a/a C.m.LEU2/leu2Δ C.d.HIS1/his1Δ</i><br><i>URA3/ura3Δ::imm<sup>434</sup> IRO1/iro1Δ::imm<sup>434</sup></i><br><i>WOR4/WOR4-GFP</i>                                                                             | This Study |
| Wor4-GFP, Opaque               | MLY1304               | <i>a/a C.m.LEU2/leu2Δ C.d.HIS1/his1Δ</i><br><i>URA3/ura3Δ::imm<sup>434</sup> IRO1/iro1Δ::imm<sup>434</sup></i><br><i>WOR4/WOR4-GFP</i>                                                                             | This Study |
| Wor4-13x myc, White            | MLY1286               | <i>a/a C.m.LEU2/leu2Δ C.d.HIS1/his1Δ</i><br><i>URA3/ura3Δ::imm<sup>434</sup> IRO1/iro1Δ::imm<sup>434</sup></i><br><i>WOR4/WOR4-13x myc</i>                                                                         | This Study |
| Wor4-13x myc, Opaque           | MLY1298               | <i>a/a C.m.LEU2/leu2Δ C.d.HIS1/his1Δ</i><br><i>URA3/ura3Δ::imm<sup>434</sup> IRO1/iro1Δ::imm<sup>434</sup></i><br><i>WOR4/WOR4-13x myc</i>                                                                         | This Study |
| Microscopy Strains             |                       |                                                                                                                                                                                                                    |            |
| HTB1-mCherry, Wor4-GFP, White  | MLY1460               | <i>a/a C.m.LEU2/leu2Δ C.d.HIS1/his1Δ</i><br><i>URA3/ura3Δ::imm<sup>434</sup> IRO1/iro1Δ::imm<sup>434</sup></i><br><i>WOR4/WOR4-GFP HTB1/HTB1-mCherry::SAT1</i>                                                     | This Study |
| HTB1-mCherry, Wor4-GFP, Opaque | MLY1467               | <i>a/a C.m.LEU2/leu2Δ C.d.HIS1/his1Δ</i><br><i>URA3/ura3Δ::imm<sup>434</sup> IRO1/iro1Δ::imm<sup>434</sup></i><br><i>WOR4/WOR4-GFP HTB1/HTB1-mCherry::SAT1</i>                                                     | This Study |

|                                |         |                                                                                                                                                    |            |
|--------------------------------|---------|----------------------------------------------------------------------------------------------------------------------------------------------------|------------|
| HTB2-mCherry, Wor4-GFP, White  | MLY1462 | <i>a/a C.m.LEU2/leu2Δ C.d.HIS1/his1Δ<br/>URA3/ura3Δ::imm<sup>434</sup> IRO1/iro1Δ::imm<sup>434</sup><br/>WOR4/WOR4-GFP HTB2/HTB2-mCherry::SAT1</i> | This Study |
| HTB2-mCherry, Wor4-GFP, Opaque | MLY1469 | <i>a/a C.m.LEU2/leu2Δ C.d.HIS1/his1Δ<br/>URA3/ura3Δ::imm<sup>434</sup> IRO1/iro1Δ::imm<sup>434</sup><br/>WOR4/WOR4-GFP HTB2/HTB2-mCherry::SAT1</i> | This Study |

## References

- 1 Noble, S. M., and A. D. Johnson, 2005 Strains and strategies for large-scale gene deletion studies of the diploid human fungal pathogen *Candida albicans*. *Eukaryot. Cell* 4: 298–309.
- 2 Zordan, R. E., D. J. Galgoczy, and A. D. Johnson, 2006 Epigenetic properties of white-opaque switching in *Candida albicans* are based on a self-sustaining transcriptional feedback loop. *Proc. Natl. Acad. Sci. U. S. A.* 103: 12807–12812.
- 3 Hernday, A. D., M. B. Lohse, P. M. Fordyce, C. J. Nobile, J. D. DeRisi et al., 2013 Structure of the Transcriptional Network Controlling White-Opaque Switching in *Candida albicans*. *Mol. Microbiol.* 90: 22–35.

Table S3: Strains used in this study.

Table S4: Ectopic expression of *WOR4* does not induce white-to-opaque switching in a *wor1* deletion strain.

White-to-Opaque  
Switching

| Strain                                         | Media Condition | Switching Frequency (%) | n   | Notes |
|------------------------------------------------|-----------------|-------------------------|-----|-------|
| Wild Type, p <i>MET3</i> -Blank                | Repressing      | <0.48                   | 208 | 1     |
| Wild Type, p <i>MET3</i> -Blank                | Inducing        | <0.26                   | 378 | 1     |
| Wild Type, p <i>MET3</i> - <i>WOR1</i>         | Repressing      | <0.48                   | 208 | 2     |
| Wild Type, p <i>MET3</i> - <i>WOR1</i>         | Inducing        | 96.98                   | 430 | 2     |
| Wild Type, p <i>MET3</i> - <i>WOR4</i>         | Repressing      | <0.48                   | 210 |       |
| Wild Type, p <i>MET3</i> - <i>WOR4</i>         | Inducing        | 20.71                   | 449 |       |
| <i>wor1/wor1</i> , p <i>MET3</i> -Blank        | Repressing      | <0.46                   | 219 |       |
| <i>wor1/wor1</i> , p <i>MET3</i> -Blank        | Inducing        | <0.23                   | 432 |       |
| <i>wor1/wor1</i> , p <i>MET3</i> - <i>WOR1</i> | Repressing      | <0.49                   | 205 |       |
| <i>wor1/wor1</i> , p <i>MET3</i> - <i>WOR1</i> | Inducing        | 100.00                  | 383 |       |
| <i>wor1/wor1</i> , p <i>MET3</i> - <i>WOR4</i> | Repressing      | <0.37                   | 272 |       |
| <i>wor1/wor1</i> , p <i>MET3</i> - <i>WOR4</i> | Inducing        | <0.18                   | 546 |       |

Notes

- 1 Negative Control
- 2 Positive Control

Table S4: Ectopic expression of *WOR4* does not induce white-to-opaque switching in a *wor1* deletion strain. Switching frequency and number of colonies scored for ectopic expression of *WOR1* and *WOR4* in the *wor1* deletion background are indicated.



Table S5: Breakdown of overlap between Wor4 binding and binding of other core regulators in white cells.

| Class         | Observed Binding | Number of Regions | Percent of Wor4 sites |
|---------------|------------------|-------------------|-----------------------|
| Single TR     | Wor4 alone       | 2                 | 22.22                 |
| Two TR        | Ahr1             | 1                 | 11.11                 |
| Two TR        | Czf1             | 1                 | 11.11                 |
| Two TR        | Efg1             | 3                 | 33.33                 |
| Three TR      | Ahr1+Czf1        | 1                 | 11.11                 |
| Three TR      | Ahr1+Efg1        | 1                 | 11.11                 |
|               |                  |                   |                       |
| Total         |                  | 9                 | 100.00                |
|               |                  |                   |                       |
| With Ahr1     |                  | 3                 | 33.33                 |
| With Czf1     |                  | 2                 | 22.22                 |
| With Efg1     |                  | 4                 | 44.44                 |
| Two or More   |                  | 7                 | 77.78                 |
| Three or More |                  | 2                 | 22.22                 |

Table S5: Breakdown of overlap between Wor4 binding and binding of other core regulators in white cells. Instances of specific binding combinations, overall overlap with specific regulators, and the number of sites with at least a given number of regulators bound are indicated. Only binding events with Wor4 present are considered. Binding of Ahr1, Czf1, and Efg1 have been previously reported (Hernday *et al.* 2013).

Table S6: Breakdown of overlap between Wor4 binding and binding of other core regulators in opaque cells.

| Class         | Observed Binding              | Number of Regions | Percent of Wor4 sites |
|---------------|-------------------------------|-------------------|-----------------------|
| Single TR     | Wor4 alone                    | 4                 | 2.92                  |
| Two TR        | Wor1                          | 8                 | 5.84                  |
| Two TR        | Wor2                          | 3                 | 2.19                  |
| Two TR        | Wor3                          | 1                 | 0.73                  |
| Three TR      | Ahr1+Wor2                     | 1                 | 0.73                  |
| Three TR      | Efg1+Wor1                     | 1                 | 0.73                  |
| Three TR      | Efg1+Wor2                     | 1                 | 0.73                  |
| Three TR      | Wor1+Wor2                     | 6                 | 4.38                  |
| Four TR       | Ahr1+Wor1+Wor2                | 2                 | 1.46                  |
| Four TR       | Czf1+Wor2+Wor3                | 1                 | 0.73                  |
| Four TR       | Efg1+Wor1+Wor2                | 27                | 19.71                 |
| Five TR       | Ahr1+Efg1+Wor1+Wor2           | 12                | 8.76                  |
| Five TR       | Ahr1+Wor1+Wor2+Wor3           | 2                 | 1.46                  |
| Five TR       | Czf1+Efg1+Wor1+Wor2           | 7                 | 5.11                  |
| Five TR       | Efg1+Wor1+Wor2+Wor3           | 17                | 12.41                 |
| Six TR        | Ahr1+Czf1+Efg1+Wor1+Wor2      | 3                 | 2.19                  |
| Six TR        | Ahr1+Efg1+Wor1+Wor2+Wor3      | 14                | 10.22                 |
| Six TR        | Czf1+Efg1+Wor1+Wor2+Wor3      | 5                 | 3.65                  |
| Seven TR      | Ahr1+Czf1+Efg1+Wor1+Wor2+Wor3 | 22                | 16.06                 |
|               |                               |                   |                       |
| Total         |                               | 137               | 100.00                |
|               |                               |                   |                       |
| With Ahr1     |                               | 56                | 40.88                 |
| With Czf1     |                               | 38                | 27.74                 |
| With Efg1     |                               | 109               | 79.56                 |
| With Wor1     |                               | 126               | 91.97                 |
| With Wor2     |                               | 123               | 89.78                 |
| With Wor3     |                               | 62                | 45.26                 |
| Two or More   |                               | 133               | 97.08                 |
|               |                               |                   |                       |
| Three or More |                               | 121               | 88.32                 |
| Four or More  |                               | 112               | 81.75                 |
| Five or More  |                               | 82                | 59.85                 |
| Six or More   |                               | 44                | 32.12                 |
|               |                               |                   |                       |
| Seven or More |                               | 22                | 16.06                 |

Table S6: Breakdown of overlap between Wor4 binding and binding of other core regulators in opaque cells. Instances of specific binding combinations, overall overlap with specific regulators, and the number of sites with at least a given number of regulators bound are indicated. Only binding events with Wor4 present are considered. Binding of Ahr1, Czf1, Efg1, Wor1, Wor2, and Wor3 have been previously reported (Zordan *et al.* 2007; Hernday *et al.* 2013; Lohse *et al.* 2013).

## Supplemental File Captions

File S1: Genomic location and median fold enrichment of Wor4-GFP peaks in white and opaque cells.

File S2: MochiView image plots of 12kb regions centered on the Wor4 binding sites in white and opaque cells. Plots produced using the SnapShot Function in MochiView v1.46 (Homann and Johnson 2010).

File S3: Compilation of microarray, RNA-seq, ChIP-seq, and ChIP-chip data presented in this study and from previous studies. From left to right in the Excel spreadsheet, columns are as follows. (A) Orf19 number designation based on the Candida Genome Database (CGD). (B) Gene name, where applicable. (C) Whether the gene is a transcriptional regulator, based on Homann *et al.* (Homann *et al.* 2009), a “1” represents yes. (D) Maximum Czf1 enrichment in the upstream region for the gene in a white cell, values are on a log<sub>2</sub> scale (Hernday *et al.* 2013). (E) Maximum Efg1 enrichment in the upstream region for the gene in a white cell; values are on a log<sub>2</sub> scale (Hernday *et al.* 2013). (F) Maximum Ahr1 enrichment in the upstream region for the gene in a white cell; values are on a log<sub>2</sub> scale (Hernday *et al.* 2013). (G) Maximum Wor4 enrichment in the upstream region for the gene in a white cell; values are MACS2 fold enrichment. (H) Maximum Wor1 enrichment in the upstream region for the gene in an opaque cell (Zordan *et al.* 2007); values are on a log<sub>2</sub> scale. (I) Maximum Wor2 enrichment in the upstream region for the gene in an opaque cell; values are on a log<sub>2</sub> scale (Hernday *et al.* 2013). (J) Maximum Czf1 enrichment in the upstream region for the gene in an opaque cell; values are on a log<sub>2</sub> scale (Hernday *et al.* 2013). (K) Maximum Efg1 enrichment in the upstream region for

the gene in an opaque cell; values are on a log<sub>2</sub> scale (Hernday *et al.* 2013). (L) Maximum Wor3 enrichment in the upstream region for the gene in an opaque cell; values are on a log<sub>2</sub> scale (Lohse *et al.* 2013). (M) Maximum Ahr1 enrichment in the upstream region for the gene in an opaque cell; values are on a log<sub>2</sub> scale (Hernday *et al.* 2013). (N) Maximum Wor4 enrichment in the upstream region for the gene in an opaque cell; values are MACS2 fold enrichment. (O) Previously published RNA-seq of opaque versus white cells (Tuch *et al.* 2010); values are on a log<sub>2</sub> scale. (P) Previously published microarray analysis of opaque versus white cells (Lohse *et al.* 2013); values are on a log<sub>2</sub> scale. (Q) Microarray analysis of a white *czf1* deletion strain versus wild-type white cells; values are on a log<sub>2</sub> scale (Hernday *et al.* 2013). (R) Microarray analysis of a white *efg1* deletion strain versus wild-type white cells; values are on a log<sub>2</sub> scale (Hernday *et al.* 2013). (S) Microarray analysis of a white *wor3* deletion strain versus wild-type white cells; values are on a log<sub>2</sub> scale (Lohse *et al.* 2013). (T) Microarray analysis of a white *ahr1* deletion strain versus wild-type white cells; values are on a log<sub>2</sub> scale (Hernday *et al.* 2013). (U) Microarray analysis of an opaque *wor2* deletion strain with ectopically expressed Wor1 versus wildtype opaque cells with ectopically expressed Wor1; values are on a log<sub>2</sub> scale (Hernday *et al.* 2013). (V) Microarray analysis of an opaque *czf1* deletion strain versus wildtype opaque cells; values are on a log<sub>2</sub> scale (Hernday *et al.* 2013). (W) Microarray analysis of an opaque *efg1* deletion strain versus wildtype opaque cells; values are on a log<sub>2</sub> scale (Hernday *et al.* 2013). (X) Microarray analysis of an opaque *wor3* deletion strain versus wildtype opaque cells; values are on a log<sub>2</sub> scale (Hernday *et al.* 2013; Lohse *et al.* 2013). (Y) Microarray analysis of an opaque *ahr1* deletion strain versus wildtype opaque cells; values are on a log<sub>2</sub> scale (Hernday *et al.* 2013).

## Supplemental Literature Cited

Hernday, A. D., M. B. Lohse, P. M. Fordyce, C. J. Nobile, J. D. DeRisi *et al.*, 2013 Structure of the transcriptional network controlling white-opaque switching in *Candida albicans*. *Mol. Microbiol.* 90: 22–35.

Homann, O. R., J. Dea, S. M. Noble, and A. D. Johnson, 2009 A phenotypic profile of the *Candida albicans* regulatory network. *PLoS Genet.* 5: e1000783.

Homann, O. R., and A. D. Johnson, 2010 MochiView: versatile software for genome browsing and DNA motif analysis. *BMC Biol.* 8: 49.

Lohse, M. B., A. D. Hernday, P. M. Fordyce, L. Noiman, T. R. Sorrells *et al.*, 2013 Identification and characterization of a previously undescribed family of sequence-specific DNA-binding domains. *Proc. Natl. Acad. Sci. U. S. A.* 110: 7660–7665.

Tuch, B. B., Q. M. Mitrovich, O. R. Homann, A. D. Hernday, C. K. Monighetti *et al.*, 2010 The transcriptomes of two heritable cell types illuminate the circuit governing their differentiation. *PLoS Genet.* 6: e1001070.

Zordan, R., M. Miller, D. Galgoczy, B. Tuch, and A. Johnson, 2007 Interlocking transcriptional feedback loops control white-opaque switching in *Candida albicans*. *PLoS Biol.* 5: e256.
