# Supplementary material for: Identification and Characterization of Wor4, a New Transcriptional Regulator of White-Opaque Switching
Source: PubMed Central journal article supplement (PMC4777133; doi:10.1534/g3.115.024885), 2016-01-13
Supplement: supp_g3.115.024885_FigureS2.pdf [file supp_g3.115.024885_FigureS2.pdf]

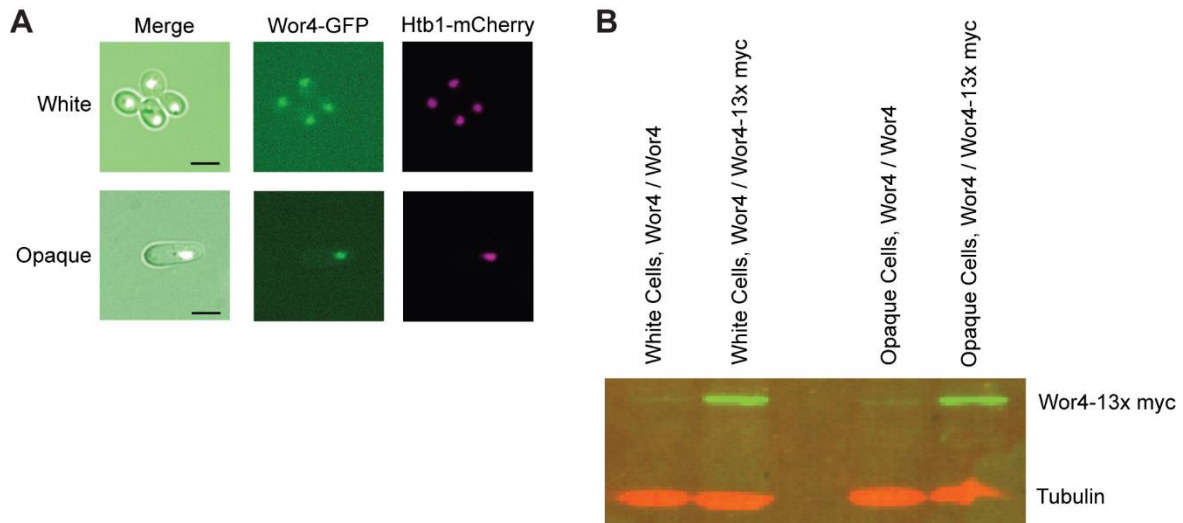

Figure S2: Wor4 localizes to the nucleus in both white and opaque cells. (a) Visualization of Wor4-GFP and Htb1-mCherry fusion proteins in both white and opaque cells. Merged images (DIC, GFP, mCherry), GFP fluorescence, and mCherry fluorescence are shown. Scale bar is 5 $\mu$ m. (b) Western blot of white and opaque strains either containing (Wor4/Wor4-13x myc) or lacking (Wor4/Wor4) c-terminally 13x myc tagged Wor4. Wor4 in green,  $\alpha$ -tubulin loading control in red.
