# Supplementary material for: Identification and Characterization of Wor4, a New Transcriptional Regulator of White-Opaque Switching
Source: PubMed Central journal article supplement (PMC4777133; doi:10.1534/g3.115.024885), 2016-01-13
Supplement: supp_g3.115.024885_TableS1.pdf [file supp_g3.115.024885_TableS1.pdf]

Table S1: Oligonucleotides used in this study.

| Category                | Name    | Description        | Oligonucleotide sequence                                         |
|-------------------------|---------|--------------------|------------------------------------------------------------------|
| pMBL180 construct ion   | MBL122  | mCherry 5' HindIII | gttacaagcttATG GTT TCT AAG GGT GAA GAA GAT                       |
| pMBL180 construct ion   | MBL121  | mCherry 3' PstI    | ctcggactgcagTTAC TTG TAC AAT TCA TCC ATA CCA CC                  |
| pMBL180 construct ion   | MBL354  | SAT1 5' PstI       | Gttaca ctgcag GAG TGA AAT TCT GGA AAT CTG GAA ATC                |
| pMBL180 construct ion   | MBL355  | SAT1 3' HindIII    | ctcggg gatcc GCA GGA CCA CCT TTG ATT GTA AAT AG                  |
|                         |         |                    |                                                                  |
| pADH76 Construct ion    | AHO696  | GFP 5' Aval        | aaaactcgagcggatccccgggtaattaacggtatgtctaaaggtgaagaattattcactggtg |
| pADH76 Construct ion    | AHO698  | GFP 3' Aval        | cttcctcgagTTATTTGTACAATTCATCCATACCATG                            |
|                         |         |                    |                                                                  |
| pADH57 construct ion    | AHO407  | TDH3 5' XbaI       | tgggtatctagatgctcctcgtcgacaacgac                                 |
| pADH57 construct ion    | AHO408  | TDH3 3' BamHI      | CCCGGGGATCCTAATTTGATTGTAAAGTTTGTGATGTTAATTG                      |
|                         |         |                    |                                                                  |
| WOR4 Ectopic Expression | MLP780  | Wor4 5' BamHI      | Gttaca GGATCC ATG TCG AGT GAT AAA CCT GAA CAA G                  |
| WOR4 Ectopic Expression | MLP781  | Wor4 3' XmaI       | CTC GGA CCC GGG TTA AAT GCC TGG TTG GGT TG                       |
| WOR4 Ectopic Expression | MLP1137 | Wor4 3' PstI       | CTC GGA CTG CAG TTA AAT GCC TGG TTG GGT TG                       |
|                         |         |                    |                                                                  |

|                         |         |                         |                                                     |
|-------------------------|---------|-------------------------|-----------------------------------------------------|
| RFG1 Ectopic Expression | MLP777  | Rfg1 5' BamHI           | Gttaca GGATCC ATG TCT ACT GCT ATC TAC TAT TCA ACT C |
| RFG1 Ectopic Expression | MLP778  | Rfg1 3' XmaI            | CTC GGA CCC GGG TTA TTG TGG AGG TTG TTG TTG ATG AT  |
|                         |         |                         |                                                     |
| WOR4 Deletion           | NHO320  | WOR4 5' External        | TTGGGCTGATCTATACTTCTGGGTA                           |
| WOR4 Deletion           | NHO321  | WOR4 5' Internal        | CACGGCGCGCCTAGCAGCGGCCTCAAGCTGCAAAAATAGTT TCTCTC    |
| WOR4 Deletion           | NHO322  | WOR4 3' Internal        | GTCAGCGGCCGCATCCCTGCGAAATGAGGATTTGAATGATC CTCTGTTG  |
| WOR4 Deletion           | NHO323  | WOR4 3' External        | TCAGCACTATCCATATCTTCAGCCA                           |
| WOR4 Deletion           | NHO324  | WOR4 5' Check           | GAAGGAATTGAGCAATAGGACAAAGATTTG                      |
| WOR4 Deletion           | NHO325  | WOR4 3' Check           | AGCGATGAATCAACATCACCAACTTG                          |
| WOR4 Deletion           | NHO326  | WOR4 5' ORF Check Set 1 | ATGCCAATTACCAACCTCAAGCTC                            |
| WOR4 Deletion           | NHO327  | WOR4 3' ORF Check Set 1 | CCATACCAATAGTTTCCAGCAGT                             |
| WOR4 Deletion           | MLP1051 | WOR4 5' ORF Check Set 2 | TAA CCA AAA AGC ATG GTC ACA GAA AAT C               |
| WOR4 Deletion           | MLP1052 | WOR4 3' ORF Check Set 2 | CAA CGT CAT TGA TTC CTA AGA GAG AC                  |
| WOR4 Deletion           | MLp1053 | WOR4 5' ORF Check Set 3 | CCT AGA TCC AAA GGA TTC AAA AAA CGC                 |
| WOR4 Deletion           | MLp1054 | WOR4 3' ORF             | CAG GAA ACG AAC AAG GAT ATT TTC TCT C               |

|               |         |                           |                                                                                                                        |
|---------------|---------|---------------------------|------------------------------------------------------------------------------------------------------------------------|
|               |         | Check Set 3               |                                                                                                                        |
| RFG1 Deletion | NHO3 47 | RFG1 5' External          | GGTGACTCCGATTTTCCGAACTAA                                                                                               |
| RFG1 Deletion | NHO3 48 | RFG1 5' Internal          | CACGGCGCGCCTAGCAGCGGTGGTGTGATGGTTTGCAAATAAATAC                                                                         |
| RFG1 Deletion | NHO3 49 | RFG1 3' Internal          | GTCAGCGGCCGCATCCCTGCGTAGCTTGCTTTCTCTACAGAAAAGAGAAT                                                                     |
| RFG1 Deletion | NHO3 50 | RFG1 3' External          | AAGGTGGCCGTGTGAGAAAGTTTA                                                                                               |
| RFG1 Deletion | NHO3 51 | RFG1 5' Check             | CACACACCTGCACACCTACATTTG                                                                                               |
| RFG1 Deletion | NHO3 52 | RFG1 3' Check             | TTGGTTTAGGACCTGGGCGT                                                                                                   |
| RFG1 Deletion | NHO3 53 | RFG1 5' ORF Check Set     | TTGGTGGTGGTATTGATGGTAACTTT                                                                                             |
| RFG1 Deletion | NH354   | RFG1 3' ORF Check Set     | ACGAGAAGTTAATCCACCACTGAGACT                                                                                            |
|               |         |                           |                                                                                                                        |
| WOR4 Tagging  | MLP87 4 | WOR4-13x Myc and - GFP 5' | Cttaggaatcaatgacgttgattcaagaaccaaatgacgataacaaccaaccaaccaggcatt<br>cggatccccgggtaattaacgg                              |
| WOR4 Tagging  | MLP87 5 | WOR4-13x Myc and - GFP 3' | TTA ATT TTC TAA AAT AAA TCT ATA TGA ATA CAA CAG<br>AGG ATC ATT CAA ATC CTC ATT TCA TTT A<br>GGCGGCCGCTCTAGAACTAGTGGATC |
| WOR4 Tagging  | mLp89 3 | WOR4 5' check             | Atgattacactgctgaaactattggtatg                                                                                          |
| WOR4 Tagging  | MLP88 0 | WOR4 3' check             | GTG GTA CGT GAC AAT GAG GTT GGG                                                                                        |
| WOR4 Tagging  | MLP87 6 | myc 5' check              | CCGTTAATTAACCCGGGGATC                                                                                                  |
| WOR4 Tagging  | MLP87 7 | myc 3' in check           | Ggaactcagatccactagtctagagc                                                                                             |

|                                |             |                            |                                                                                                                          |
|--------------------------------|-------------|----------------------------|--------------------------------------------------------------------------------------------------------------------------|
| WOR4 Tagging                   | MLP87<br>8  | myc 3'<br>flipped<br>check | TCACTAGTGAATTTCGCGCTCGAG                                                                                                 |
| WOR4 Tagging                   | MBL20<br>9  | GFP 5'<br>check            | GGT TGG CCA TGG AAC TGG CA                                                                                               |
| WOR4 Tagging                   | MBL38<br>2  | GFP 3'<br>flipped<br>check | GGT GAT GGT CCA GTC TTG TTA CCA GAC                                                                                      |
|                                |             |                            |                                                                                                                          |
| HTB1<br>and<br>HTB2<br>Tagging | MLP11<br>94 | HTB1-<br>mCherr<br>y 5'    | gccgtttccgaaggtaccagagccgtcacaaaatactcatctgcttctagt<br>ggtAGAAGAatcCCAGGTtaattaac GTT TCT AAG GGT GAA GAA<br>GAT A       |
| HTB1<br>and<br>HTB2<br>Tagging | MLP11<br>95 | HTB1-<br>mCherr<br>y 3'    | AAA AAA AAA GTG GGC AAC TAA AAA TAC AAT TGG GAG<br>ACA ATA CAA GAT CCA TCA CAT CTA GCA GGA CCA CCT<br>TTG ATT GTA AAT AG |
| HTB1<br>and<br>HTB2<br>Tagging | MLP11<br>92 | HTB2-<br>mCherr<br>y 5'    | gctgtttctgaaggtactagagctgttaccaaatactcttctgcttcta<br>ggtAGAAGAatcCCAGGTtaattaac GTT TCT AAG GGT GAA GAA GAT A            |
| HTB1<br>and<br>HTB2<br>Tagging | MLP11<br>93 | HTB2-<br>mCherr<br>y 3'    | AAC AAT AAT TTG GAG AAA TAA ACC ATT CAT GAC AAA<br>CCT CTC TCT CTC TTT CTT TTT TTA GCA GGA CCA CCT<br>TTG ATT GTA AAT AG |
| HTB1<br>and<br>HTB2<br>Tagging | mLP11<br>98 | HTB1 5'<br>check           | TCT CCT TCT CTC TCT TGT CAC TTC TTC TTC CTC                                                                              |
| HTB1<br>and<br>HTB2<br>Tagging | MLP11<br>99 | HTB1 3'<br>check           | CCA AGA GGT CCC TGA AAT TCA GAA GTT TCT TG                                                                               |
| HTB1<br>and<br>HTB2<br>Tagging | MLp11<br>96 | HTB2 5'<br>check           | CAA TAA CAA CAA GAG ATT CAC GTG ACA CAC AAA                                                                              |
| HTB1<br>and                    | MLP11<br>97 | HTB2 3'<br>check           | GGA GAT AGA AAA GAA TTG GGT CCA ACA CCA                                                                                  |

|                                |             |                         |                                         |
|--------------------------------|-------------|-------------------------|-----------------------------------------|
| HTB2<br>Tagging                |             |                         |                                         |
| HTB1<br>and<br>HTB2<br>Tagging | MLP12<br>03 | mCherr<br>y 5'<br>check | TTG TGG AGA CAA AAT ATC CCA GGC GAA TG  |
| HTB1<br>and<br>HTB2<br>Tagging | MLP12<br>04 | mCherr<br>y 3'<br>Check | TTG ACC TCT TCA CGT ATA AAA CTA GAC CTC |
|                                |             |                         |                                         |
| qPCR                           | MLP11<br>86 | Wor1 5'                 | TGGGTATGGTAACCACCTT                     |
| qPCR                           | MLP11<br>87 | Wor1 3'                 | TGATACTACCTGTACCAGTCGCAA                |
| qPCR                           | MLP11<br>90 | Dyn1<br>control<br>5'   | CATCCAACACTTCCAACCAATTACATTA            |
| qPCR                           | MLP11<br>91 | Dyn1<br>control<br>3'   | TAATTCTTGTTCAAAAGCCAAAGATTCTG           |
