# Supplementary material for: Identification and Characterization of Wor4, a New Transcriptional Regulator of White-Opaque Switching
Source: PubMed Central journal article supplement (PMC4777133; doi:10.1534/g3.115.024885), 2016-01-13
Supplement: supp_g3.115.024885_TableS2.pdf [file supp_g3.115.024885_TableS2.pdf]

Table S2: Plasmids used in this study.

| Description                       | Name    | Reference  |
|-----------------------------------|---------|------------|
| <i>LEU2</i> Knock Out             | pSN40   | 1          |
| <i>HIS1</i> Knock Out             | pSN52   | 1          |
| <i>Arg MTL Knock Out Cassette</i> | pJD1    | 2          |
| p <i>MET3-blank-SAT1</i>          | pADH33  | 3          |
| p <i>TDH3-blank-SAT1</i>          | pADH57  | This Study |
| p <i>MET3-WOR1-SAT1</i>           | pADH35  | 4          |
| p <i>MET3-WOR4-SAT1</i>           | pMBL640 | This Study |
| p <i>MET3-RFG1-SAT1</i>           | pMBL639 | This Study |
| p <i>TDH3-WOR4-SAT1</i>           | pMBL707 | This Study |
| C-terminal CaGFP Source           | pADH76  | This Study |
| C-terminal 13x Myc Source         | pADH34  | 5          |
| C-terminal mCherry Source         | pMBL180 | This Study |

## References

- 1 Noble, S. M., and A. D. Johnson, 2005 Strains and strategies for large-scale gene deletion studies of the diploid human fungal pathogen *Candida albicans*. Eukaryot. Cell 4: 298–309.
- 2 Lin, C. H., S. Kabrawala, E. P. Fox, C. J. Nobile, A. D. Johnson et al., 2013 Genetic control of conventional and pheromone-stimulated biofilm formation in *Candida albicans*. PLoS Pathog. 9: e1003305.
- 3 Lohse, M. B., A. D. Hernday, P. M. Fordyce, L. Noiman, T. R. Sorrells et al., 2013 Identification and characterization of a previously undescribed family of sequence-specific DNA-binding domains. Proc. Natl. Acad. Sci. U. S. A. 110: 7660–7665.
- 4 Hernday, A. D., M. B. Lohse, P. M. Fordyce, C. J. Nobile, J. D. DeRisi et al., 2013 Structure of the Transcriptional Network Controlling White-Opaque Switching in *Candida albicans*. Mol. Microbiol. 90: 22–35.
- 5 Hernday, A. D., S. M. Noble, Q. M. Mitrovich, and A. D. Johnson, 2010 Genetics and molecular biology in *Candida albicans*. Methods Enzymol. 470: 737–758.
