# Supplementary material for: Identification and Characterization of Wor4, a New Transcriptional Regulator of White-Opaque Switching
Source: PubMed Central journal article supplement (PMC4777133; doi:10.1534/g3.115.024885), 2016-01-13
Supplement: supp_g3.115.024885_TableS3.pdf [file supp_g3.115.024885_TableS3.pdf]

Table S3: Strains used in this study.

| Description                    | Number              | Genotype                                                                                                                                                             | Reference  |
|--------------------------------|---------------------|----------------------------------------------------------------------------------------------------------------------------------------------------------------------|------------|
| Starting Strains               |                     |                                                                                                                                                                      |            |
| a/α -His -Leu -Arg Strain      | SNY152              | <i>a/alpha leu2Δ/leu2Δ his1Δ/his1Δ</i><br><i>URA3/ura3Δ::imm<sup>434</sup> IRO1/iro1Δ::imm<sup>434</sup></i><br><i>arg1::hisG/arg1::hisG</i>                         | 1          |
| a/a -His -Leu Strain           | RZY47               | <i>a/a leu2Δ/leu2Δ his1Δ/his1Δ</i><br><i>URA3/ura3Δ::imm<sup>434</sup> IRO1/iro1Δ::imm<sup>434</sup></i>                                                             | 2          |
| Controls                       |                     |                                                                                                                                                                      |            |
| Wild Type, White               | WTwhite,<br>AHY304  | <i>a/Δalpha C.m.LEU2/leu2Δ C.d.HIS1/his1Δ</i><br><i>URA3/ura3Δ::imm<sup>434</sup> IRO1/iro1Δ::imm<sup>434</sup></i><br><i>arg1::hisG/arg1::hisG ΔMTLalpha ::ARG1</i> | 3          |
| Wild Type, Opaque              | WTopaque,<br>AHY336 | <i>a/Δalpha C.m.LEU2/leu2Δ C.d.HIS1/his1Δ</i><br><i>URA3/ura3Δ::imm<sup>434</sup> IRO1/iro1Δ::imm<sup>434</sup></i><br><i>arg1::hisG/arg1::hisG ΔMTLalpha ::ARG1</i> | 3          |
| Wild Type, White               | AHY135              | <i>a/a C.m.LEU2/leu2Δ C.d.HIS1/his1Δ</i><br><i>URA3/ura3Δ::imm<sup>434</sup> IRO1/iro1Δ::imm<sup>434</sup></i>                                                       | 3          |
| Wild Type, Opaque              | AHY136              | <i>a/a C.m.LEU2/leu2Δ C.d.HIS1/his1Δ</i><br><i>URA3/ura3Δ::imm<sup>434</sup> IRO1/iro1Δ::imm<sup>434</sup></i>                                                       | 3          |
| Ectopic Expression Strains     |                     |                                                                                                                                                                      |            |
| Wild Type, White, pMET3-Blank  | AHY214              | <i>a/a C.m.LEU2/leu2Δ C.d.HIS1/his1Δ</i><br><i>URA3/ura3Δ::imm<sup>434</sup> IRO1/iro1Δ::imm<sup>434</sup></i><br>pMET3-blank; SAT1; RP10                            | 3          |
| Wild Type, Opaque, pMET3-Blank | AHY375,<br>MLY1166  | <i>a/a C.m.LEU2/leu2Δ C.d.HIS1/his1Δ</i><br><i>URA3/ura3Δ::imm<sup>434</sup> IRO1/iro1Δ::imm<sup>434</sup></i><br>pMET3-blank; SAT1; RP10                            | This study |
| Wild Type, White, pMET3-WOR1   | AHY204              | <i>a/a C.m.LEU2/leu2Δ C.d.HIS1/his1Δ</i><br><i>URA3/ura3Δ::imm<sup>434</sup> IRO1/iro1Δ::imm<sup>434</sup></i><br>pMET3-WOR1; SAT1; RP10                             | 3          |
| Wild Type, Opaque, pMET3-WOR1  | MLY1165             | <i>a/a C.m.LEU2/leu2Δ C.d.HIS1/his1Δ</i><br><i>URA3/ura3Δ::imm<sup>434</sup> IRO1/iro1Δ::imm<sup>434</sup></i><br>pMET3-WOR1; SAT1; RP10                             | This Study |
| Wild Type, White, pMET3-WOR4   | MLY1214             | <i>a/a C.m.LEU2/leu2Δ C.d.HIS1/his1Δ</i><br><i>URA3/ura3Δ::imm<sup>434</sup> IRO1/iro1Δ::imm<sup>434</sup></i><br>pMET3-WOR4; SAT1; RP10                             | This Study |
| Wild Type, Opaque, pMET3-WOR4  | MLY1230             | <i>a/a C.m.LEU2/leu2Δ C.d.HIS1/his1Δ</i><br><i>URA3/ura3Δ::imm<sup>434</sup> IRO1/iro1Δ::imm<sup>434</sup></i><br>pMET3-WOR4; SAT1; RP10                             | This Study |

|                                          |                     |                                                                                                                                                                                                                    |            |
|------------------------------------------|---------------------|--------------------------------------------------------------------------------------------------------------------------------------------------------------------------------------------------------------------|------------|
| Wild Type, White,<br>pMET3-RFG1          | MLY1221             | <i>a/a C.m.LEU2/leu2Δ C.d.HIS1/his1Δ<br/>URA3/ura3Δ::imm<sup>434</sup> IRO1/iro1Δ::imm<sup>434</sup><br/>pMET3-RFG1; SAT1; RP10</i>                                                                                | This Study |
| Wild Type, Opaque,<br>pMET3-RFG1         | MLY1241             | <i>a/a C.m.LEU2/leu2Δ C.d.HIS1/his1Δ<br/>URA3/ura3Δ::imm<sup>434</sup> IRO1/iro1Δ::imm<sup>434</sup><br/>pMET3-RFG1; SAT1; RP10</i>                                                                                | This Study |
| <i>wor4/wor4</i> , White,<br>pMET3-Blank | MLY1372,<br>MLY1379 | <i>a/Δalpha leu2Δ/leu2Δ his1Δ/his1Δ<br/>URA3/ura3Δ::imm<sup>434</sup> IRO1/iro1Δ::imm<sup>434</sup><br/>arg1::hisG/arg1::hisG<br/>wor4Δ::C.m.LEU2/wor4Δ::C.d.HIS1 ΔMTLalpha<br/>::ARG1 pMET3-blank; SAT1; RP10</i> | This Study |
| <i>wor4/wor4</i> , White,<br>pMET3-WOR1  | MLY1373,<br>MLY1380 | <i>a/Δalpha leu2Δ/leu2Δ his1Δ/his1Δ<br/>URA3/ura3Δ::imm<sup>434</sup> IRO1/iro1Δ::imm<sup>434</sup><br/>arg1::hisG/arg1::hisG<br/>wor4Δ::C.m.LEU2/wor4Δ::C.d.HIS1 ΔMTLalpha<br/>::ARG1 pMET3-WOR1; SAT1; RP10</i>  | This Study |
| Wild Type, White,<br>pMET3-Blank         | MLY1365             | <i>a/Δalpha C.m.LEU2/leu2Δ C.d.HIS1/his1Δ<br/>URA3/ura3Δ::imm<sup>434</sup> IRO1/iro1Δ::imm<sup>434</sup><br/>arg1::hisG/arg1::hisG ΔMTLalpha ::ARG1<br/>pMET3-blank; SAT1; RP10</i>                               | This Study |
| Wild Type, White,<br>pMET3-WOR1          | MLY1366             | <i>a/Δalpha C.m.LEU2/leu2Δ C.d.HIS1/his1Δ<br/>URA3/ura3Δ::imm<sup>434</sup> IRO1/iro1Δ::imm<sup>434</sup><br/>arg1::hisG/arg1::hisG ΔMTLalpha ::ARG1<br/>pMET3-WOR1; SAT1; RP10</i>                                | This Study |
| <i>wor1/wor1</i> , White,<br>pMET3-Blank | MLY1393             | <i>a/a leu2Δ/leu2Δ his1Δ/his1Δ<br/>URA3/ura3Δ::imm<sup>434</sup> IRO1/iro1Δ::imm<sup>434</sup><br/>wor1Δ::C.m.LEU2/wor1Δ::C.d.HIS1 pMET3-<br/>blank; SAT1; RP10</i>                                                | This Study |
| <i>wor1/wor1</i> , White,<br>pMET3-WOR1  | MLY1394             | <i>a/a leu2Δ/leu2Δ his1Δ/his1Δ<br/>URA3/ura3Δ::imm<sup>434</sup> IRO1/iro1Δ::imm<sup>434</sup><br/>wor1Δ::C.m.LEU2/wor1Δ::C.d.HIS1 pMET3-<br/>WOR1; SAT1; RP10</i>                                                 | This Study |
| <i>wor1/wor1</i> , White,<br>pMET3-WOR4  | MLY1395             | <i>a/a leu2Δ/leu2Δ his1Δ/his1Δ<br/>URA3/ura3Δ::imm<sup>434</sup> IRO1/iro1Δ::imm<sup>434</sup><br/>wor1Δ::C.m.LEU2/wor1Δ::C.d.HIS1 pMET3-<br/>WOR4; SAT1; RP10</i>                                                 | This Study |
| Wild Type, pTDH3-WOR4                    | MLY1420             | <i>a/a C.m.LEU2/leu2Δ C.d.HIS1/his1Δ<br/>URA3/ura3Δ::imm<sup>434</sup> IRO1/iro1Δ::imm<sup>434</sup><br/>pTDH3-WOR4; SAT1; RP10</i>                                                                                | This Study |
| Deletion Strains                         |                     |                                                                                                                                                                                                                    |            |

|                                |                       |                                                                                                                                                                                                                    |            |
|--------------------------------|-----------------------|--------------------------------------------------------------------------------------------------------------------------------------------------------------------------------------------------------------------|------------|
| <i>wor1/wor1</i> , White       | RZY219                | <i>a/a leu2Δ/leu2Δ his1Δ/his1Δ</i><br><i>URA3/ura3Δ::imm<sup>434</sup> IRO1/iro1Δ::imm<sup>434</sup></i><br><i>wor1Δ::C.m.LEU2/wor1Δ::C.d.HIS1</i>                                                                 | 2          |
| <i>WOR4/wor4</i> , White       | MLY1135               | <i>a/a leu2Δ/leu2Δ his1Δ/his1Δ</i><br><i>URA3/ura3Δ::imm<sup>434</sup> IRO1/iro1Δ::imm<sup>434</sup></i><br><i>WOR4/wor4Δ::C.d.HIS1</i>                                                                            | This Study |
| <i>WOR4/wor4</i> , Opaque      | MLY1137               | <i>a/a leu2Δ/leu2Δ his1Δ/his1Δ</i><br><i>URA3/ura3Δ::imm<sup>434</sup> IRO1/iro1Δ::imm<sup>434</sup></i><br><i>WOR4/wor4Δ::C.d.HIS1</i>                                                                            | This Study |
| <i>wor4/wor4</i> , White       | MLY1355A,<br>MLY1355B | <i>a/Δalpha leu2Δ/leu2Δ his1Δ/his1Δ</i><br><i>URA3/ura3Δ::imm<sup>434</sup> IRO1/iro1Δ::imm<sup>434</sup></i><br><i>arg1::hisG/arg1::hisG</i><br><i>wor4Δ::C.m.LEU2/wor4Δ::C.d.HIS1 ΔMTLalpha</i><br><i>::ARG1</i> | This Study |
| <i>rfg1/rfg1</i> , White       | MLY1136               | <i>a/a leu2Δ/leu2Δ his1Δ/his1Δ</i><br><i>URA3/ura3Δ::imm<sup>434</sup> IRO1/iro1Δ::imm<sup>434</sup></i><br><i>rfg1Δ::C.m.LEU2/rfg1Δ::C.d.HIS1</i>                                                                 | This Study |
| <i>rfg1/rfg1</i> , Opaque      | MLY1138               | <i>a/a leu2Δ/leu2Δ his1Δ/his1Δ</i><br><i>URA3/ura3Δ::imm<sup>434</sup> IRO1/iro1Δ::imm<sup>434</sup></i><br><i>rfg1Δ::C.m.LEU2/rfg1Δ::C.d.HIS1</i>                                                                 | This Study |
| Tagged Strains                 |                       |                                                                                                                                                                                                                    |            |
| Wor4-GFP, White                | MLY1295               | <i>a/a C.m.LEU2/leu2Δ C.d.HIS1/his1Δ</i><br><i>URA3/ura3Δ::imm<sup>434</sup> IRO1/iro1Δ::imm<sup>434</sup></i><br><i>WOR4/WOR4-GFP</i>                                                                             | This Study |
| Wor4-GFP, Opaque               | MLY1304               | <i>a/a C.m.LEU2/leu2Δ C.d.HIS1/his1Δ</i><br><i>URA3/ura3Δ::imm<sup>434</sup> IRO1/iro1Δ::imm<sup>434</sup></i><br><i>WOR4/WOR4-GFP</i>                                                                             | This Study |
| Wor4-13x myc, White            | MLY1286               | <i>a/a C.m.LEU2/leu2Δ C.d.HIS1/his1Δ</i><br><i>URA3/ura3Δ::imm<sup>434</sup> IRO1/iro1Δ::imm<sup>434</sup></i><br><i>WOR4/WOR4-13x myc</i>                                                                         | This Study |
| Wor4-13x myc, Opaque           | MLY1298               | <i>a/a C.m.LEU2/leu2Δ C.d.HIS1/his1Δ</i><br><i>URA3/ura3Δ::imm<sup>434</sup> IRO1/iro1Δ::imm<sup>434</sup></i><br><i>WOR4/WOR4-13x myc</i>                                                                         | This Study |
| Microscopy Strains             |                       |                                                                                                                                                                                                                    |            |
| HTB1-mCherry, Wor4-GFP, White  | MLY1460               | <i>a/a C.m.LEU2/leu2Δ C.d.HIS1/his1Δ</i><br><i>URA3/ura3Δ::imm<sup>434</sup> IRO1/iro1Δ::imm<sup>434</sup></i><br><i>WOR4/WOR4-GFP HTB1/HTB1-mCherry::SAT1</i>                                                     | This Study |
| HTB1-mCherry, Wor4-GFP, Opaque | MLY1467               | <i>a/a C.m.LEU2/leu2Δ C.d.HIS1/his1Δ</i><br><i>URA3/ura3Δ::imm<sup>434</sup> IRO1/iro1Δ::imm<sup>434</sup></i><br><i>WOR4/WOR4-GFP HTB1/HTB1-mCherry::SAT1</i>                                                     | This Study |

|                                |         |                                                                                                                                                    |            |
|--------------------------------|---------|----------------------------------------------------------------------------------------------------------------------------------------------------|------------|
| HTB2-mCherry, Wor4-GFP, White  | MLY1462 | <i>a/a C.m.LEU2/leu2Δ C.d.HIS1/his1Δ<br/>URA3/ura3Δ::imm<sup>434</sup> IRO1/iro1Δ::imm<sup>434</sup><br/>WOR4/WOR4-GFP HTB2/HTB2-mCherry::SAT1</i> | This Study |
| HTB2-mCherry, Wor4-GFP, Opaque | MLY1469 | <i>a/a C.m.LEU2/leu2Δ C.d.HIS1/his1Δ<br/>URA3/ura3Δ::imm<sup>434</sup> IRO1/iro1Δ::imm<sup>434</sup><br/>WOR4/WOR4-GFP HTB2/HTB2-mCherry::SAT1</i> | This Study |

## References

- 1 Noble, S. M., and A. D. Johnson, 2005 Strains and strategies for large-scale gene deletion studies of the diploid human fungal pathogen *Candida albicans*. *Eukaryot. Cell* 4: 298–309.
- 2 Zordan, R. E., D. J. Galgoczy, and A. D. Johnson, 2006 Epigenetic properties of white-opaque switching in *Candida albicans* are based on a self-sustaining transcriptional feedback loop. *Proc. Natl. Acad. Sci. U. S. A.* 103: 12807–12812.
- 3 Hernday, A. D., M. B. Lohse, P. M. Fordyce, C. J. Nobile, J. D. DeRisi et al., 2013 Structure of the Transcriptional Network Controlling White-Opaque Switching in *Candida albicans*. *Mol. Microbiol.* 90: 22–35.
