# Supplementary material for: Identification and Characterization of Wor4, a New Transcriptional Regulator of White-Opaque Switching
Source: PubMed Central journal article supplement (PMC4777133; doi:10.1534/g3.115.024885), 2016-01-13
Supplement: supp_g3.115.024885_TableS4.pdf [file supp_g3.115.024885_TableS4.pdf]

Table S4: Ectopic expression of *WOR4* does not induce white-to-opaque switching in a *wor1* deletion strain.

White-to-Opaque  
Switching

| Strain                                         | Media Condition | Switching Frequency (%) | n   | Notes |
|------------------------------------------------|-----------------|-------------------------|-----|-------|
| Wild Type, p <i>MET3</i> -Blank                | Repressing      | <0.48                   | 208 | 1     |
| Wild Type, p <i>MET3</i> -Blank                | Inducing        | <0.26                   | 378 | 1     |
| Wild Type, p <i>MET3</i> - <i>WOR1</i>         | Repressing      | <0.48                   | 208 | 2     |
| Wild Type, p <i>MET3</i> - <i>WOR1</i>         | Inducing        | 96.98                   | 430 | 2     |
| Wild Type, p <i>MET3</i> - <i>WOR4</i>         | Repressing      | <0.48                   | 210 |       |
| Wild Type, p <i>MET3</i> - <i>WOR4</i>         | Inducing        | 20.71                   | 449 |       |
| <i>wor1/wor1</i> , p <i>MET3</i> -Blank        | Repressing      | <0.46                   | 219 |       |
| <i>wor1/wor1</i> , p <i>MET3</i> -Blank        | Inducing        | <0.23                   | 432 |       |
| <i>wor1/wor1</i> , p <i>MET3</i> - <i>WOR1</i> | Repressing      | <0.49                   | 205 |       |
| <i>wor1/wor1</i> , p <i>MET3</i> - <i>WOR1</i> | Inducing        | 100.00                  | 383 |       |
| <i>wor1/wor1</i> , p <i>MET3</i> - <i>WOR4</i> | Repressing      | <0.37                   | 272 |       |
| <i>wor1/wor1</i> , p <i>MET3</i> - <i>WOR4</i> | Inducing        | <0.18                   | 546 |       |

Notes

- 1 Negative Control
- 2 Positive Control

Table S4: Ectopic expression of *WOR4* does not induce white-to-opaque switching in a *wor1* deletion strain. Switching frequency and number of colonies scored for ectopic expression of *WOR1* and *WOR4* in the *wor1* deletion background are indicated.
