# Supplementary material for: Identification and Characterization of Wor4, a New Transcriptional Regulator of White-Opaque Switching
Source: PubMed Central journal article supplement (PMC4777133; doi:10.1534/g3.115.024885), 2016-01-13
Supplement: supp_g3.115.024885_TableS5.pdf [file supp_g3.115.024885_TableS5.pdf]

Table S5: Breakdown of overlap between Wor4 binding and binding of other core regulators in white cells.

| Class         | Observed Binding | Number of Regions | Percent of Wor4 sites |
|---------------|------------------|-------------------|-----------------------|
| Single TR     | Wor4 alone       | 2                 | 22.22                 |
| Two TR        | Ahr1             | 1                 | 11.11                 |
| Two TR        | Czf1             | 1                 | 11.11                 |
| Two TR        | Efg1             | 3                 | 33.33                 |
| Three TR      | Ahr1+Czf1        | 1                 | 11.11                 |
| Three TR      | Ahr1+Efg1        | 1                 | 11.11                 |
|               |                  |                   |                       |
| Total         |                  | 9                 | 100.00                |
|               |                  |                   |                       |
| With Ahr1     |                  | 3                 | 33.33                 |
| With Czf1     |                  | 2                 | 22.22                 |
| With Efg1     |                  | 4                 | 44.44                 |
| Two or More   |                  | 7                 | 77.78                 |
| Three or More |                  | 2                 | 22.22                 |

Table S5: Breakdown of overlap between Wor4 binding and binding of other core regulators in white cells. Instances of specific binding combinations, overall overlap with specific regulators, and the number of sites with at least a given number of regulators bound are indicated. Only binding events with Wor4 present are considered. Binding of Ahr1, Czf1, and Efg1 have been previously reported (Hernday *et al.* 2013).
