# Supplementary material for: Identification and Characterization of Wor4, a New Transcriptional Regulator of White-Opaque Switching
Source: PubMed Central journal article supplement (PMC4777133; doi:10.1534/g3.115.024885), 2016-01-13
Supplement: supp_g3.115.024885_TableS6.pdf [file supp_g3.115.024885_TableS6.pdf]

Table S6: Breakdown of overlap between Wor4 binding and binding of other core regulators in opaque cells.

| Class         | Observed Binding              | Number of Regions | Percent of Wor4 sites |
|---------------|-------------------------------|-------------------|-----------------------|
| Single TR     | Wor4 alone                    | 4                 | 2.92                  |
| Two TR        | Wor1                          | 8                 | 5.84                  |
| Two TR        | Wor2                          | 3                 | 2.19                  |
| Two TR        | Wor3                          | 1                 | 0.73                  |
| Three TR      | Ahr1+Wor2                     | 1                 | 0.73                  |
| Three TR      | Efg1+Wor1                     | 1                 | 0.73                  |
| Three TR      | Efg1+Wor2                     | 1                 | 0.73                  |
| Three TR      | Wor1+Wor2                     | 6                 | 4.38                  |
| Four TR       | Ahr1+Wor1+Wor2                | 2                 | 1.46                  |
| Four TR       | Czf1+Wor2+Wor3                | 1                 | 0.73                  |
| Four TR       | Efg1+Wor1+Wor2                | 27                | 19.71                 |
| Five TR       | Ahr1+Efg1+Wor1+Wor2           | 12                | 8.76                  |
| Five TR       | Ahr1+Wor1+Wor2+Wor3           | 2                 | 1.46                  |
| Five TR       | Czf1+Efg1+Wor1+Wor2           | 7                 | 5.11                  |
| Five TR       | Efg1+Wor1+Wor2+Wor3           | 17                | 12.41                 |
| Six TR        | Ahr1+Czf1+Efg1+Wor1+Wor2      | 3                 | 2.19                  |
| Six TR        | Ahr1+Efg1+Wor1+Wor2+Wor3      | 14                | 10.22                 |
| Six TR        | Czf1+Efg1+Wor1+Wor2+Wor3      | 5                 | 3.65                  |
| Seven TR      | Ahr1+Czf1+Efg1+Wor1+Wor2+Wor3 | 22                | 16.06                 |
|               |                               |                   |                       |
| Total         |                               | 137               | 100.00                |
|               |                               |                   |                       |
| With Ahr1     |                               | 56                | 40.88                 |
| With Czf1     |                               | 38                | 27.74                 |
| With Efg1     |                               | 109               | 79.56                 |
| With Wor1     |                               | 126               | 91.97                 |
| With Wor2     |                               | 123               | 89.78                 |
| With Wor3     |                               | 62                | 45.26                 |
| Two or More   |                               | 133               | 97.08                 |
|               |                               |                   |                       |
| Three or More |                               | 121               | 88.32                 |
| Four or More  |                               | 112               | 81.75                 |
| Five or More  |                               | 82                | 59.85                 |
| Six or More   |                               | 44                | 32.12                 |
|               |                               |                   |                       |
| Seven or More |                               | 22                | 16.06                 |

Table S6: Breakdown of overlap between Wor4 binding and binding of other core regulators in opaque cells. Instances of specific binding combinations, overall overlap with specific regulators, and the number of sites with at least a given number of regulators bound are indicated. Only binding events with Wor4 present are considered. Binding of Ahr1, Czf1, Efg1, Wor1, Wor2, and Wor3 have been previously reported (Zordan *et al.* 2007; Hernday *et al.* 2013; Lohse *et al.* 2013).
